# Supplementary material
Source: PubMed Central journal article supplement (PMC5857357)

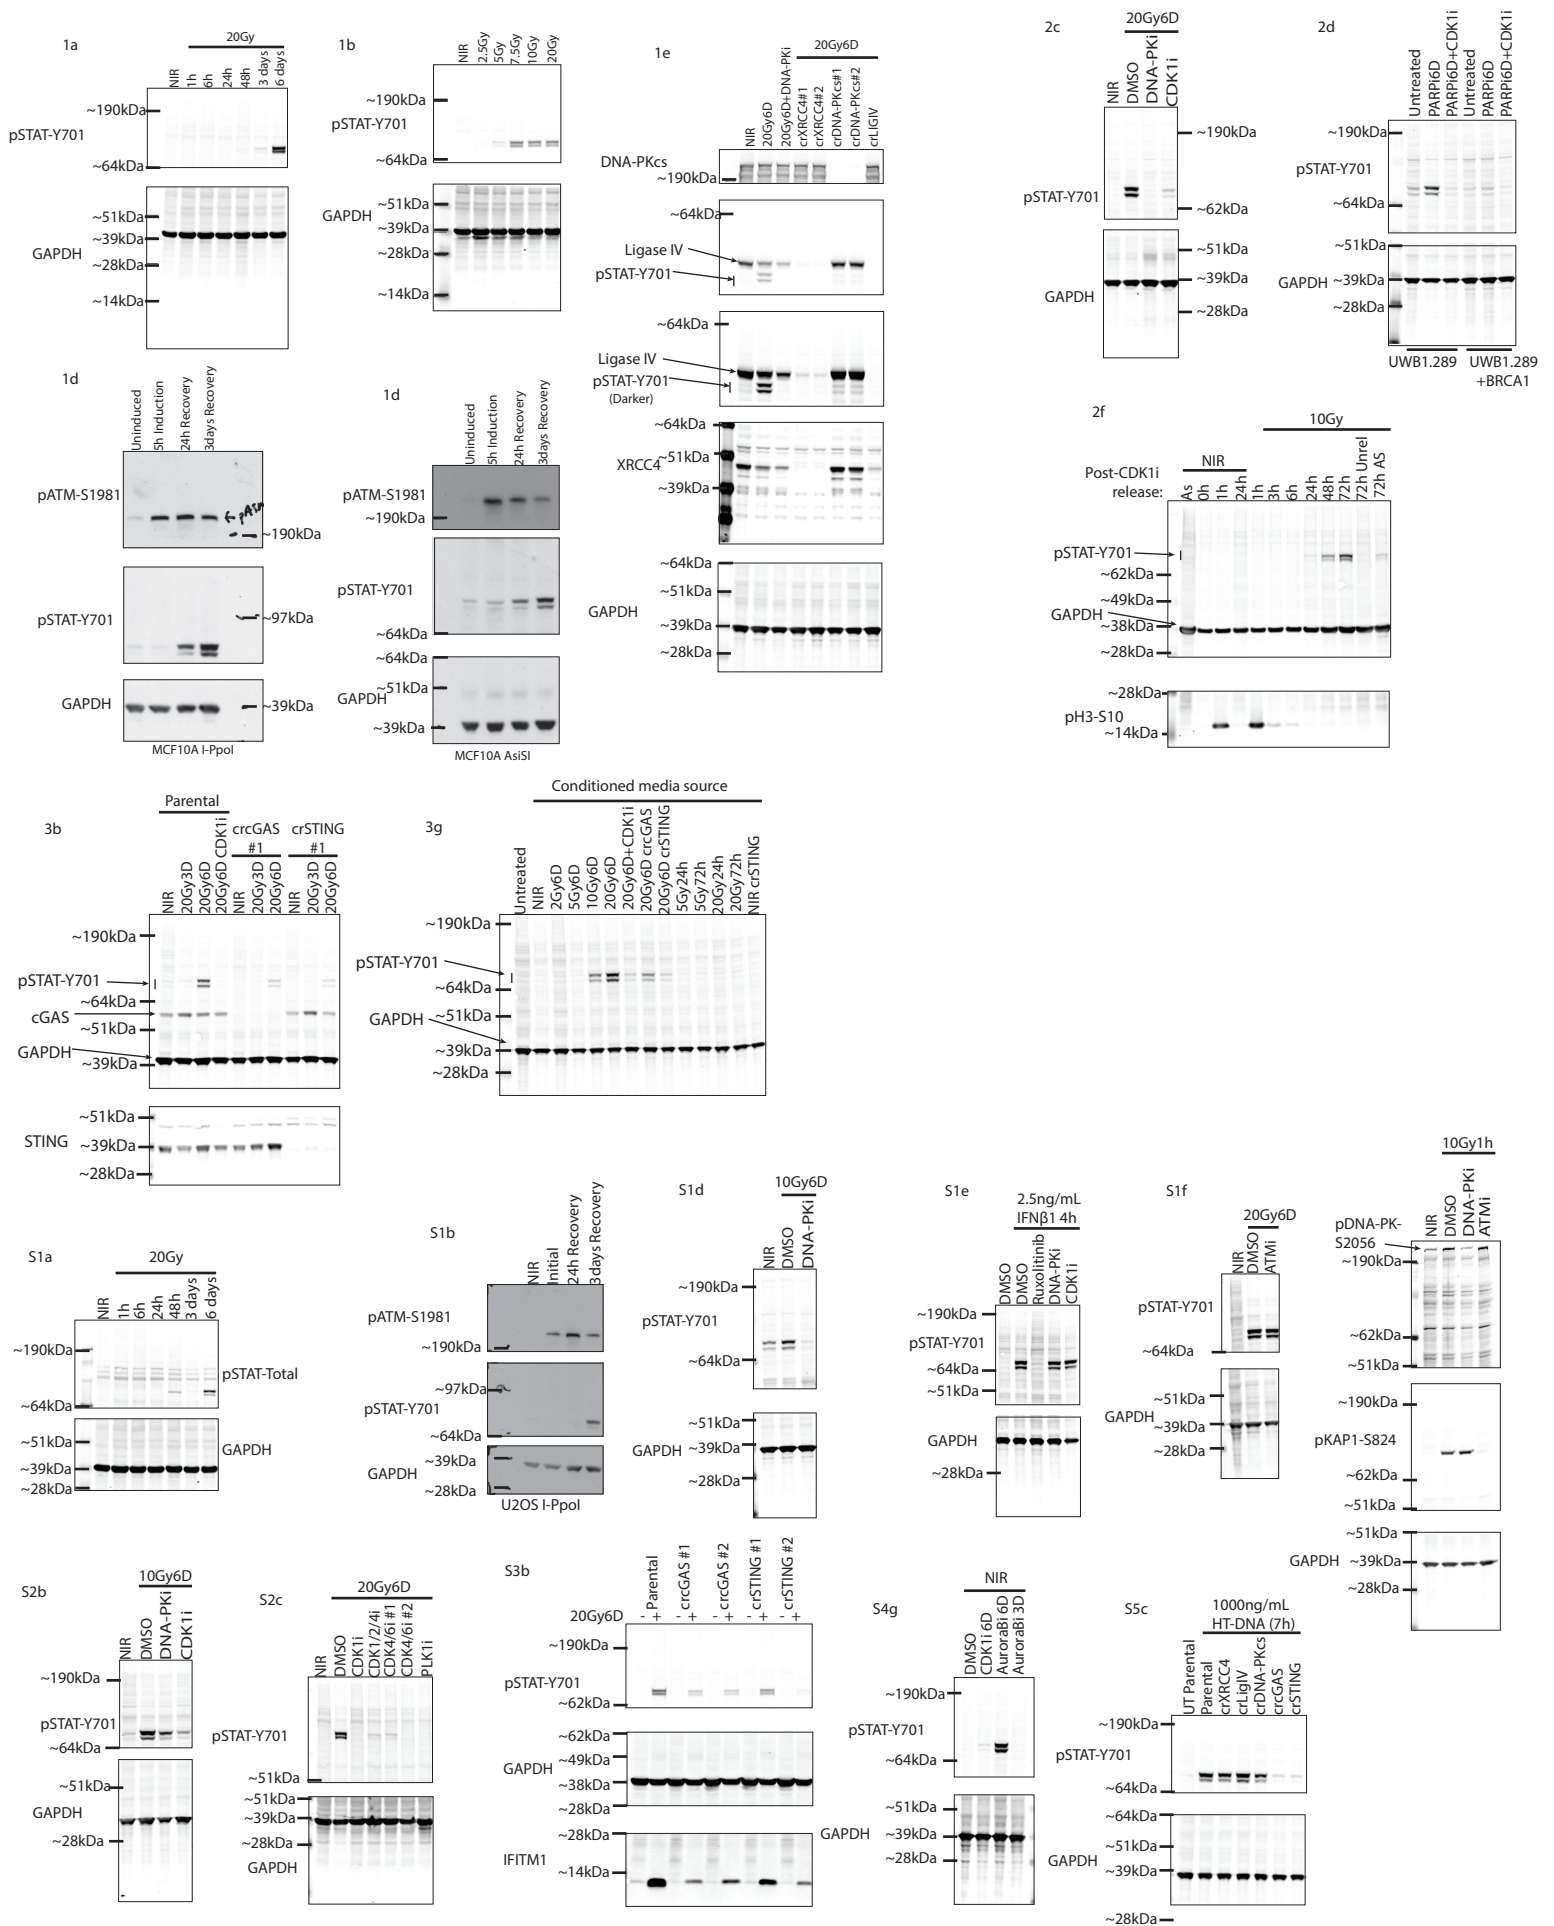

Supplementary Figure 1: Source data of western blot scans

Supplement: NIHMS892290-supplement-Suppl_Fig_1.pdf [file NIHMS892290-supplement-Suppl_Fig_1.pdf]
